# Supplementary material for: Disruption of the HIF-1 pathway in individuals with Ollier disease and Maffucci syndrome
Source: PubMed Central journal article supplement (PMC9767349; doi:10.1371/journal.pgen.1010504), 2022-12-08
Supplement: pgen.1010504.s003.pdf [file pgen.1010504.s003.pdf]

**Genes p<0.05 by DESeq2 and Partek – Proband, Normoxia (4) vs. Control, Normoxia (3)**

| <i>Gene Name</i> | <i>Partek Fold Change</i> | <i>DESeq2 Fold Change</i> | <i>Gene Name</i> | <i>Partek Fold Change</i> | <i>DESeq2 Fold Change</i> |
|------------------|---------------------------|---------------------------|------------------|---------------------------|---------------------------|
| ACTA2            | -3.97                     | -2.51                     | KLF2             | -2.09                     | -1.86                     |
| ADAMTSL4         | 2.50                      | 2.17                      | LMO4             | 1.48                      | 1.50                      |
| AHNAK            | 1.72                      | 1.74                      | LRP1             | 2.16                      | 2.05                      |
| ANKRD1           | -4.19                     | -2.94                     | MARCKSL1         | 2.33                      | 2.29                      |
| BEX1             | -9.21                     | -3.84                     | MRPL20           | -1.55                     | -1.47                     |
| C1R              | 1.76                      | 1.78                      | MYL12B           | -1.45                     | -1.38                     |
| CALD1            | -1.85                     | -1.70                     | OSMR             | 1.80                      | 1.81                      |
| CAV2             | -1.61                     | -1.52                     | OXTR             | -4.85                     | -2.74                     |
| CFD              | 4.20                      | 2.66                      | PHLDA2           | -2.27                     | -2.01                     |
| CLTB             | -1.43                     | -1.36                     | PKDCC            | 3.35                      | 2.53                      |
| COL12A1          | 2.41                      | 2.19                      | PLK3             | -1.80                     | -1.65                     |
| CRIP1            | -4.67                     | -2.63                     | PPP1R14A         | -4.76                     | -2.82                     |
| EBNA1BP2         | -1.44                     | -1.38                     | PRDX6            | -1.89                     | -1.72                     |
| FAM43A           | -3.49                     | -2.99                     | PRRC2B           | 1.32                      | 1.36                      |
| FGF5             | -2.22                     | -2.01                     | PRRC2C           | 1.36                      | 1.40                      |
| FH               | -1.545                    | -1.46                     | RHOBTB3          | 1.72                      | 1.76                      |
| FLNB             | 1.74                      | 1.75                      | RN7SL3           | 5.57                      | 2.59                      |
| FTSJ1            | -1.53                     | -1.44                     | RPL26L1          | -1.49                     | -1.41                     |
| FZD1             | 1.84                      | 1.81                      | RPS6KB2          | -1.41                     | -1.34                     |
| GAA              | 2.37                      | 2.36                      | RRP36            | -1.39                     | -1.33                     |
| HES4             | -8.92                     | -3.34                     | SELENOH          | -1.69                     | -1.58                     |
| HSPB6            | -2.07                     | -1.88                     | SELENOW          | -1.95                     | -1.79                     |
| HSPG2            | 2.56                      | 2.25                      | SEMA7A           | -2.22                     | -1.97                     |
| IGFBP7           | -4.33                     | -3.25                     | SLC25A23         | 2.12                      | 2.00                      |
| IL17RA           | 1.46                      | 1.48                      | SOX4             | 1.95                      | 1.85                      |
| IL1R1            | 1.95                      | 1.86                      | SRGN             | -2.65                     | -2.11                     |
| ITGB1BP1         | -1.43                     | -1.35                     | TIMP3            | -2.38                     | -2.00                     |
| ITM2C            | 2.34                      | 2.17                      | TNC              | 3.24                      | 3.01                      |
| KLC1             | -1.43                     | -1.36                     | WFS1             | 1.52                      | 1.55                      |

**S1 Table.** 58 differentially expressed genes as determined by both Partek GSA and DESeq2 with p<0.05. Fold change by each algorithm is given.
