# Supplementary material for: Disruption of the HIF-1 pathway in individuals with Ollier disease and Maffucci syndrome
Source: PubMed Central journal article supplement (PMC9767349; doi:10.1371/journal.pgen.1010504), 2022-12-08
Supplement: pgen.1010504.s004.pdf [file pgen.1010504.s004.pdf]

**Genes p<0.05 by DESeq2 and Partek -  
 Proband, Hypoxia (3) vs. Control, Hypoxia (3)**

| <i>Gene Name</i> | <i>Partek Fold Change</i> | <i>DESeq2 Fold Change</i> |
|------------------|---------------------------|---------------------------|
| BEX4             | 3.44                      | 2.46                      |
| C11orf87         | -9.52                     | -3.89                     |
| C1orf198         | -3.58                     | -2.84                     |
| CFD              | 9.4                       | 3.21                      |
| COX7A1           | -2.51                     | -2.15                     |
| DGKQ             | -1.75                     | -1.66                     |
| FAM43A           | -2.85                     | -2.41                     |
| FTH1             | 1.81                      | 1.80                      |
| FTH1P3           | 1.82                      | 1.79                      |
| GAA              | 2.02                      | 1.99                      |
| GDF6             | -5.92                     | -3.14                     |
| GLIPR1           | 2.7                       | 2.35                      |
| HES1             | -9.12                     | -2.77                     |
| HOXA11           | -7.75                     | -2.75                     |
| HSPA2            | -3.06                     | -2.47                     |
| IPO13            | -1.79                     | -1.70                     |
| ITM2C            | 2.18                      | 2.02                      |
| LBH              | -3.58                     | -2.87                     |
| LDLRAD2          | 2.43                      | 2.17                      |
| MAB21L1          | -6.1                      | -3.4                      |
| NR2F2            | -3.98                     | -2.64                     |
| PKD2             | -2.21                     | -2.01                     |
| PLXND1           | -2.12                     | -1.95                     |
| PVR              | 2                         | 1.92                      |
| SMAD7            | -2.04                     | -1.90                     |
| TBX2             | -7.39                     | -3.57                     |
| TGM2             | -5.53                     | -3.69                     |
| TNC              | 2.84                      | 2.56                      |

**S2 Table.** 28 differentially expressed genes as determined by both Partek GSA and DESeq2 with p<0.05. Fold change by each algorithm is given.
