# Supplementary material for: Disruption of the HIF-1 pathway in individuals with Ollier disease and Maffucci syndrome
Source: PubMed Central journal article supplement (PMC9767349; doi:10.1371/journal.pgen.1010504), 2022-12-08
Supplement: pgen.1010504.s005.pdf [file pgen.1010504.s005.pdf]

**Genes p<0.05 by DESeq2 and Partek - Proband, Hypoxia (3) vs. Proband, Normoxia (3)**

| <i>Gene Name</i> | <i>Partek<br/>Fold<br/>Change</i> | <i>DESeq2<br/>Fold<br/>Change</i> | <i>Gene Name</i> | <i>Partek<br/>Fold<br/>Change</i> | <i>DESeq2 Fold<br/>Change</i> |
|------------------|-----------------------------------|-----------------------------------|------------------|-----------------------------------|-------------------------------|
| ABCE1            | -2.05                             | -1.79                             | MZT2A            | 1.51                              | 1.74                          |
| ABCF2            | -1.85                             | -1.60                             | NAA50            | -1.59                             | -1.43                         |
| ABHD15           | -1.96                             | -1.72                             | NAA80            | 1.37                              | 1.51                          |
| ABTB1            | 1.56                              | 1.81                              | NAP1L3           | -4.66                             | -3.02                         |
| ACADVL           | 1.38                              | 1.68                              | NCDN             | -1.99                             | -1.70                         |
| ACTG1            | 1.35                              | 1.53                              | NCKIPSD          | 1.27                              | 1.60                          |
| ADAMTSL4         | 2.18                              | 2.10                              | NCL              | -1.53                             | -1.33                         |
| ADAR             | -1.72                             | -1.47                             | NDRG1            | 3.1                               | 2.96                          |
| ADPRHL2          | 1.39                              | 1.69                              | NDUFB4           | 1.18                              | 1.40                          |
| AEN              | -2.47                             | -1.99                             | NDUFB8           | 1.28                              | 1.56                          |
| AHSA1            | -1.53                             | -1.35                             | NOL3             | 1.57                              | 1.89                          |
| AKR7A2           | 1.23                              | 1.46                              | NOL6             | -2.09                             | -1.78                         |
| ALDH3A2          | -3.18                             | -2.32                             | NOLC1            | -1.94                             | -1.63                         |
| ALDOA            | 1.56                              | 1.89                              | NOP14            | -1.9                              | -1.66                         |
| ANGPTL4          | 5.43                              | 3.09                              | NOP2             | -2.88                             | -2.49                         |
| ANKRD37          | 2.02                              | 2.00                              | NOP9             | -1.65                             | -1.47                         |
| ANKRD52          | -1.73                             | -1.47                             | NPM3             | -2.22                             | -1.81                         |
| ANKZF1           | 1.65                              | 2.09                              | NQO1             | -3.63                             | -2.64                         |
| ANXA7            | -1.75                             | -1.56                             | NR2F1            | 1.87                              | 2.16                          |
| APBB1            | 1.34                              | 1.56                              | NRN1             | 2.35                              | 2.67                          |
| APEX1            | -1.62                             | -1.40                             | NSUN2            | -1.67                             | -1.46                         |
| APLN             | 5.04                              | 3.16                              | NTAN1            | 1.45                              | 1.62                          |
| ARHGAP1          | -1.56                             | -1.40                             | NUDT16           | -1.75                             | -1.49                         |
| ARHGEF25         | 1.48                              | 1.71                              | NUDT22           | 1.37                              | 1.65                          |
| ARRDC3           | 2.51                              | 2.72                              | OAF              | -1.97                             | -1.68                         |
| ATMIN            | -1.6                              | -1.38                             | OCEL1            | 1.54                              | 1.66                          |
| ATP13A1          | -1.94                             | -1.71                             | ODC1             | -2.53                             | -2.08                         |
| ATP1A1           | -1.54                             | -1.42                             | OGFOD1           | -1.73                             | -1.52                         |
| AXL              | 1.33                              | 1.58                              | ORAI3            | 1.44                              | 1.67                          |
| B3GALT4          | 2.94                              | 3.31                              | OST4             | 1.39                              | 1.55                          |
| BCKDK            | 2.01                              | 2.49                              | OTUD1            | 1.62                              | 1.93                          |
| BNIP3            | 2.58                              | 3.00                              | P4HA2            | 1.87                              | 2.06                          |
| BNIP3L           | 2.25                              | 2.79                              | PAIP2            | 1.55                              | 1.82                          |
| BOLA1            | 1.43                              | 1.65                              | PAQR7            | 1.44                              | 1.74                          |
| BRK1             | 1.24                              | 1.42                              | PARP1            | -1.71                             | -1.46                         |

|          |       |       |          |       |       |
|----------|-------|-------|----------|-------|-------|
| BTG1     | 2.07  | 2.15  | PCAT6    | 2.15  | 2.97  |
| C11orf68 | 1.29  | 1.46  | PCNX3    | -1.72 | -1.51 |
| C12orf49 | -1.65 | -1.50 | PCYT2    | -2.62 | -2.23 |
| C1QBP    | -1.78 | -1.53 | PFKL     | 1.61  | 2.00  |
| C4orf3   | 2.13  | 2.57  | PFKP     | 1.88  | 2.13  |
| CAD      | -2.65 | -2.28 | PGAM1    | 1.62  | 1.96  |
| CALCOCO1 | 1.55  | 1.81  | PGAM4    | 1.65  | 2.03  |
| CALHM2   | 1.36  | 1.54  | PGAM5    | -2.17 | -1.79 |
| CARHSP1  | 1.46  | 1.84  | PGD      | -2.55 | -2.02 |
| CBX6     | -2    | -1.70 | PGK1     | 2.42  | 2.89  |
| CCDC97   | -1.85 | -1.59 | PI4K2A   | -1.5  | -1.34 |
| CCNDBP1  | 1.52  | 1.63  | PIGW     | -2.57 | -2.08 |
| CCT6A    | -1.85 | -1.65 | PIH1D1   | 1.3   | 1.53  |
| CD276    | -1.87 | -1.74 | PLAUR    | 1.6   | 1.63  |
| CENPT    | 1.35  | 1.51  | PLEKHB2  | -1.6  | -1.49 |
| CERCAM   | 1.54  | 1.81  | PLSCR3   | 1.35  | 1.58  |
| CFLAR    | 1.33  | 1.60  | PMM1     | 1.45  | 1.62  |
| CHP1     | -1.61 | -1.39 | PNPLA2   | 1.25  | 1.55  |
| CHST3    | -1.94 | -1.73 | PNRC1    | 1.48  | 1.72  |
| CKB      | 3.07  | 2.66  | POLD4    | 1.59  | 1.94  |
| CLCN7    | -2.22 | -2.06 | POLR2H   | 1.39  | 1.63  |
| CLUH     | -1.98 | -1.76 | POLR3H   | -1.69 | -1.49 |
| CNDP2    | -1.82 | -1.55 | POLRMT   | -1.68 | -1.45 |
| CNOT8    | 1.7   | 2.04  | PPAN     | 1.3   | 1.62  |
| CS       | -1.46 | -1.31 | PPM1F    | -1.62 | -1.41 |
| CSNK1E   | 1.42  | 1.69  | PPP1R13L | 2.12  | 2.09  |
| CSTF2T   | -1.66 | -1.43 | PPP1R16A | 1.64  | 2.02  |
| DCAF11   | -1.51 | -1.34 | PPP1R35  | 1.68  | 1.94  |
| DDIT4    | 2.42  | 2.78  | PPP1R3D  | -1.83 | -1.50 |
| DDT      | 1.48  | 1.76  | PPP1R3G  | 2.26  | 2.80  |
| DDX1     | -1.47 | -1.31 | PPRC1    | -2.29 | -1.98 |
| DDX19A   | -1.51 | -1.31 | PRMT5    | -1.62 | -1.43 |
| DDX21    | -1.98 | -1.67 | PRPF19   | -1.85 | -1.60 |
| DDX41    | 2.13  | 2.49  | PSMD11   | -1.78 | -1.57 |
| DHX9     | -1.65 | -1.45 | PSME3    | -1.8  | -1.56 |
| DNAJA1   | -1.78 | -1.57 | PSMG1    | -2.05 | -1.72 |
| DOLK     | -1.81 | -1.57 | PTPN23   | -1.58 | -1.40 |
| DPYSL3   | -1.66 | -1.43 | PTPRF    | 1.88  | 2.15  |
| DVL2     | -1.57 | -1.38 | PXDC1    | 1.48  | 1.72  |
| EGLN1    | 1.5   | 1.84  | PYCR3    | -1.99 | -1.76 |

|          |       |       |          |       |       |
|----------|-------|-------|----------|-------|-------|
| EHD2     | 1.38  | 1.60  | PYGB     | -2.18 | -1.85 |
| EMC9     | 1.85  | 1.97  | RAB29    | -1.65 | -1.52 |
| ENO1     | 1.41  | 1.69  | RAB32    | 1.31  | 1.52  |
| ENO2     | 2.93  | 3.53  | RANBP6   | -1.99 | -1.77 |
| EPAS1    | -2.71 | -2.16 | RASSF1   | 1.62  | 1.72  |
| EPHX1    | -2.72 | -2.25 | RFK      | -1.78 | -1.57 |
| ERO1A    | 2.32  | 2.40  | RFX5     | -1.85 | -1.65 |
| ERRFI1   | 2.92  | 2.24  | RGL2     | 1.24  | 1.48  |
| ETF1     | -1.55 | -1.37 | RGMB     | 1.97  | 2.05  |
| EXTL3    | -1.78 | -1.50 | RIOK3    | 1.57  | 1.81  |
| F3       | 5.53  | 5.48  | RNASE4   | 2.36  | 2.56  |
| FAM114A1 | 1.28  | 1.44  | RNASEH2C | 1.51  | 1.66  |
| FAM98A   | -1.82 | -1.65 | RNF181   | 1.27  | 1.53  |
| FASN     | -3.22 | -2.77 | RNF208   | 2.29  | 2.79  |
| FBXO30   | -1.84 | -1.60 | RNF227   | 2.39  | 2.70  |
| FCHSD1   | 1.44  | 1.61  | RPS19    | 1.24  | 1.51  |
| FEZ2     | 1.46  | 1.58  | RPS26P11 | 1.5   | 1.83  |
| FHOD1    | -1.96 | -1.74 | RRAGA    | 1.34  | 1.55  |
| FKBP8    | 1.31  | 1.56  | RRAS     | 1.38  | 1.69  |
| FLAD1    | -1.78 | -1.50 | RRP36    | -1.85 | -1.59 |
| FRMD8    | -1.44 | -1.33 | RRP9     | -2.44 | -2.11 |
| FUT11    | 1.48  | 1.70  | RRS1     | -3.51 | -2.91 |
| FYTTD1   | -1.61 | -1.40 | RSAD1    | -2.05 | -1.79 |
| G6PD     | -1.75 | -1.49 | RTL8C    | 1.28  | 1.47  |
| GADD45B  | 1.76  | 2.01  | SAR1B    | -1.66 | -1.44 |
| GAPDH    | 2.02  | 2.44  | SCAMP3   | -1.82 | -1.62 |
| GCN1     | -1.73 | -1.50 | SCO2     | -1.86 | -1.59 |
| GLTP     | 1.73  | 1.97  | SEC61G   | 1.69  | 2.00  |
| GNB2     | 1.24  | 1.42  | SEMA7A   | 2.03  | 2.33  |
| GNPDA1   | -2.9  | -2.61 | SERPINE1 | 3.17  | 3.24  |
| GORASP1  | -1.6  | -1.40 | SIGMAR1  | -1.7  | -1.50 |
| GOT2     | -1.8  | -1.60 | SLC16A3  | 2.08  | 2.41  |
| GPANK1   | 1.2   | 1.40  | SLC27A1  | 1.57  | 1.69  |
| GPATCH4  | -2.19 | -1.79 | SLC27A4  | -2.25 | -1.93 |
| GPI      | 1.49  | 1.92  | SLC2A1   | 2.18  | 2.69  |
| GPR176   | 1.23  | 1.56  | SLC30A1  | -2.23 | -1.85 |
| GSPT1    | -1.49 | -1.36 | SLC35F6  | -1.77 | -1.55 |
| GYS1     | 2.56  | 2.86  | SLC38A7  | -1.85 | -1.68 |
| HACD3    | -1.47 | -1.34 | SLC48A1  | -2.1  | -1.63 |
| HAGH     | 1.37  | 1.52  | SMIM3    | 2.42  | 2.51  |

|              |       |       |          |       |       |
|--------------|-------|-------|----------|-------|-------|
| HAS2         | 3.85  | 3.68  | SMYD5    | -1.66 | -1.42 |
| HCFC1R1      | 1.93  | 1.97  | SNHG3    | -2.13 | -1.88 |
| HDAC3        | 1.36  | 1.60  | SNX19    | -1.75 | -1.47 |
| HILPDA       | 4.13  | 4.94  | SNX21    | 1.51  | 1.73  |
| HMBS         | -2.11 | -1.70 | SNX33    | 1.64  | 1.90  |
| HSD3B7       | 1.63  | 1.79  | SPR      | -2.06 | -1.79 |
| HSP90AB1     | -1.57 | -1.38 | SPSB2    | -3.57 | -2.88 |
| HSPA4        | -2.38 | -2.14 | SPSB3    | 1.36  | 1.61  |
| HSPA8        | -1.64 | -1.47 | SQSTM1   | -2.74 | -2.66 |
| HSPD1        | -1.7  | -1.50 | SRPRA    | -1.61 | -1.40 |
| HSPE1        | -1.73 | -1.56 | SRPRB    | -2.24 | -1.92 |
| HSPH1        | -2.73 | -2.48 | SRSF9    | 1.18  | 1.43  |
| HYAL2        | -2.41 | -2.04 | STARD7   | -1.74 | -1.50 |
| IDH1         | -2.47 | -1.99 | STBD1    | 1.84  | 1.90  |
| IER3         | 2.79  | 2.78  | STC1     | 5.3   | 8.93  |
| IL7R         | 2.57  | 3.52  | STIP1    | -1.52 | -1.35 |
| IMP4         | -1.78 | -1.54 | STK25    | 1.31  | 1.51  |
| INHBB        | 4.54  | 8.76  | STRIP1   | -1.8  | -1.51 |
| INSIG2       | 2.61  | 2.84  | SYDE1    | 1.25  | 1.45  |
| IPO13        | -1.98 | -1.74 | SYNPO    | 3     | 2.88  |
| IPO7         | -1.7  | -1.53 | TALDO1   | -1.63 | -1.46 |
| ITGA5        | 1.29  | 1.48  | TAP2     | -2.28 | -1.83 |
| JOSD2        | 1.41  | 1.62  | TFRC     | -3.14 | -2.55 |
| KAT2A        | -1.82 | -1.41 | TGFBI    | 2.04  | 2.05  |
| KCTD11       | 2.06  | 2.83  | TIMP1    | 1.83  | 1.82  |
| KCTD12       | -2.32 | -1.88 | TIMP3    | 2.24  | 2.12  |
| KDM6B        | 1.55  | 1.86  | TKT      | -2.34 | -2.00 |
| KIAA0930     | -2.17 | -1.83 | TMEM106B | -1.71 | -1.46 |
| KIAA1191     | 1.55  | 1.84  | TMEM107  | 1.93  | 2.26  |
| KLF6         | 1.65  | 1.76  | TMEM126B | -1.67 | -1.53 |
| KLHL21       | -2.06 | -1.90 | TMEM158  | 3.63  | 2.80  |
| KRTAP1-5     | 2.93  | 2.70  | TMEM251  | -2.11 | -1.79 |
| LDHA         | 1.78  | 2.13  | TMSB10   | 2.05  | 2.18  |
| LDLRAD2      | 2.17  | 2.57  | TNFAIP2  | 1.58  | 1.98  |
| LGALS1       | 1.49  | 1.77  | TNIP1    | 1.51  | 1.90  |
| LOC105369340 | 2.28  | 2.31  | TOR3A    | -2.37 | -2.00 |
| LOC105376805 | 2.28  | 2.17  | TP53     | -2.43 | -1.87 |
| LOC152048    | -2.23 | -2.05 | TPI1     | 2.49  | 3.45  |
| LOX          | 2.56  | 2.32  | TRADD    | 1.56  | 1.77  |
| LOXL2        | 1.86  | 2.13  | TRIM26   | -1.72 | -1.52 |

|          |       |       |          |       |       |
|----------|-------|-------|----------|-------|-------|
| LSM10    | -1.92 | -1.61 | TRPT1    | 1.45  | 1.71  |
| LTBR     | -1.83 | -1.51 | TXNIP    | 1.68  | 2.06  |
| M6PR     | -1.52 | -1.38 | TXNRD1   | -2.19 | -1.81 |
| MAFF     | 1.74  | 2.35  | UBQLN1   | -1.49 | -1.31 |
| MANF     | 1.33  | 1.48  | UFSP1    | -2.8  | -2.11 |
| MAPK7    | 1.49  | 1.75  | USB1     | -1.66 | -1.41 |
| MDM2     | -1.6  | -1.40 | USP5     | -1.78 | -1.62 |
| MEIS3    | 1.61  | 2.01  | VARS     | -2.05 | -1.75 |
| METRNL   | 1.55  | 1.84  | VDAC1    | 1.31  | 1.55  |
| METTL26  | 1.52  | 2.03  | VEGFA    | 2.97  | 3.48  |
| MIF      | 1.82  | 2.38  | VEGFB    | 1.5   | 1.67  |
| MIF-AS1  | 1.78  | 2.27  | VIM      | 1.5   | 1.58  |
| MIR210HG | 2.34  | 3.70  | VKORC1   | 1.69  | 1.87  |
| MOSPD3   | 1.73  | 2.04  | VPS18    | -1.77 | -1.61 |
| MPG      | 1.42  | 1.73  | VPS26B   | -1.56 | -1.30 |
| MPI      | 1.74  | 2.09  | VWA1     | 2.34  | 2.24  |
| MPV17L2  | -2.41 | -2.03 | WDR45B   | 1.32  | 1.62  |
| MRGBP    | 1.32  | 1.68  | WDR46    | -1.64 | -1.43 |
| MRPL34   | -1.92 | -1.65 | WDR54    | 2.12  | 2.75  |
| MRPS26   | -1.76 | -1.50 | WDR77    | -1.75 | -1.54 |
| MSANTD3  | 1.29  | 1.46  | WDR81    | -1.87 | -1.70 |
| MT1L     | 3.35  | 2.52  | WSB1     | 1.89  | 2.26  |
| MT2A     | 2.34  | 2.08  | YPEL3    | 1.71  | 2.08  |
| MTFP1    | 2.03  | 2.27  | ZFYVE19  | 1.24  | 1.44  |
| MTMR11   | 1.72  | 1.82  | ZMPSTE24 | -1.5  | -1.37 |
| MYADM    | 1.88  | 2.06  | ZNF395   | 3.03  | 3.59  |
| MYBBP1A  | -2.23 | -1.97 |          |       |       |

**S3 Table.** 363 differentially expressed genes as determined by both Partek GSA and DESeq2 with  $p < 0.05$ . Fold change by each algorithm is given.
