# Supplementary material for: Disruption of the HIF-1 pathway in individuals with Ollier disease and Maffucci syndrome
Source: PubMed Central journal article supplement (PMC9767349; doi:10.1371/journal.pgen.1010504), 2022-12-08
Supplement: pgen.1010504.s006.pdf [file pgen.1010504.s006.pdf]

**Genes p<0.05 by DESeq2 and Partek - Control, Hypoxia (3) vs. Control, Normoxia (3)**

| <i>Gene Name</i> | <i>Partek Fold Change</i> | <i>DESeq2 Fold Change</i> | <i>Gene Name</i> | <i>Partek Fold Change</i> | <i>DESeq2 Fold Change</i> |
|------------------|---------------------------|---------------------------|------------------|---------------------------|---------------------------|
| ADAMTSL4         | 2.12                      | 2.04                      | MUC1             | 2.49                      | 2.54                      |
| ADH5             | -1.95                     | -1.59                     | MYADM            | 1.39                      | 1.57                      |
| AIMP2            | -2.57                     | -2.07                     | NAB2             | 1.39                      | 1.57                      |
| ALDOA            | 1.68                      | 1.80                      | NDRG1            | 3.53                      | 2.86                      |
| ALDOC            | 4.26                      | 2.81                      | NEU1             | -1.99                     | -1.61                     |
| ALKBH5           | 1.55                      | 1.69                      | NOL3             | 2                         | 1.96                      |
| ANGPTL4          | 7.29                      | 4.80                      | NOP2             | -2.16                     | -1.74                     |
| ANKZF1           | 2.06                      | 2.03                      | NOP56            | -2.01                     | -1.65                     |
| APBB1            | 1.37                      | 1.55                      | NPM3             | -3.32                     | -2.42                     |
| APEX1            | -1.74                     | -1.45                     | NQO1             | -4.7                      | -2.76                     |
| APLN             | 19.9                      | 4.34                      | OBSL1            | 1.4                       | 1.59                      |
| APOL6            | -2.45                     | -1.87                     | ODC1             | -2.53                     | -1.89                     |
| ARRDC3           | 1.62                      | 1.74                      | OSMR             | 1.37                      | 1.55                      |
| BCKDK            | 1.76                      | 1.97                      | P4HA2            | 1.81                      | 1.86                      |
| BCL2L2           | 1.28                      | 1.47                      | P4HB             | 1.28                      | 1.47                      |
| BNIP3            | 3.81                      | 2.96                      | PAQR7            | 1.68                      | 1.89                      |
| BNIP3L           | 2.24                      | 2.16                      | PCAT6            | 4.25                      | 3.24                      |
| C11orf98         | -2.38                     | -1.88                     | PCYT2            | -2.31                     | -1.87                     |
| C4orf3           | 2.02                      | 2.08                      | PFKL             | 1.82                      | 1.92                      |
| CA12             | 4.57                      | 3.67                      | PFKP             | 1.8                       | 1.92                      |
| CACNB3           | 1.46                      | 1.65                      | PGAM1            | 1.56                      | 1.71                      |
| CCT6A            | -1.9                      | -1.56                     | PGAM4            | 2                         | 2.02                      |
| CDK4             | -1.93                     | -1.58                     | PGK1             | 2.91                      | 2.65                      |
| CHST2            | -2.95                     | -2.15                     | PGM1             | 1.79                      | 1.97                      |
| CLCN7            | -1.91                     | -1.57                     | PIGY             | -1.81                     | -1.50                     |
| CLTA             | -1.8                      | -1.50                     | PLOD2            | 2.65                      | 2.23                      |
| CNBP             | -1.66                     | -1.39                     | PLXNA3           | 1.66                      | 1.82                      |
| CNDP2            | -1.69                     | -1.41                     | PPP1R13L         | 1.9                       | 1.97                      |
| COX14            | -1.89                     | -1.56                     | PPP1R16A         | 1.77                      | 1.89                      |
| DDX21            | -2.09                     | -1.65                     | PPP1R3G          | 3.45                      | 3.53                      |
| DDX41            | 2.49                      | 2.42                      | PRMT5            | -1.76                     | -1.46                     |
| DUSP1            | 1.99                      | 2.12                      | PRMT6            | -1.91                     | -1.57                     |
| EGLN1            | 1.83                      | 1.98                      | PSMC2            | -1.75                     | -1.45                     |
| ENO1             | 1.57                      | 1.75                      | PSMG1            | -2.52                     | -1.94                     |
| ENO2             | 5.11                      | 3.31                      | PTPRF            | 2.94                      | 2.96                      |
| EPAS1            | -2.99                     | -2.28                     | PYURF            | -1.81                     | -1.50                     |
| ERO1A            | 2.46                      | 2.51                      | RAB29            | -2.05                     | -1.63                     |

|          |       |       |          |       |       |
|----------|-------|-------|----------|-------|-------|
| ERRFI1   | 3     | 2.25  | RASSF7   | 2.04  | 2.04  |
| FAM57A   | 1.57  | 1.74  | RHBDD3   | -1.96 | -1.60 |
| FTH1     | -1.91 | -1.60 | RNASE4   | 2.4   | 2.51  |
| FTH1P3   | -1.97 | -1.60 | RNF208   | 4.12  | 3.39  |
| FUT11    | 1.67  | 1.83  | RRP9     | -2.77 | -2.15 |
| FZD1     | 1.52  | 1.69  | RRS1     | -2.73 | -2.10 |
| GAPDH    | 2.16  | 2.24  | RSAD1    | -1.94 | -1.59 |
| GLTP     | 1.43  | 1.63  | SEPHS2   | -1.78 | -1.48 |
| GNPDA1   | -2.64 | -2.06 | SERPINE1 | 2.34  | 2.44  |
| GPATCH4  | -2.72 | -2.07 | SLC16A3  | 2.69  | 2.62  |
| GPI      | 1.76  | 1.82  | SLC2A1   | 2.95  | 2.34  |
| GPR176   | 1.33  | 1.53  | SLC35E1  | 1.59  | 1.73  |
| GYS1     | 3.03  | 3.03  | SLC3A2   | -2.09 | -1.71 |
| HAS2     | 2.01  | 2.02  | SMIM3    | 1.67  | 1.87  |
| HCFC1R1  | 2.02  | 2.00  | SNHG15   | -2.46 | -1.88 |
| HILPDA   | 3.44  | 2.75  | SNX33    | 1.61  | 1.74  |
| HSD17B10 | -1.97 | -1.62 | SPSB2    | -3.46 | -2.24 |
| HSPD1    | -1.81 | -1.50 | SQSTM1   | -3.18 | -2.46 |
| HSPH1    | -2.14 | -1.70 | SRPRB    | -1.92 | -1.56 |
| IGIP     | 1.66  | 1.79  | SRXN1    | -2.07 | -1.69 |
| ILF3-DT  | -2.13 | -1.70 | SSSCA1   | -1.83 | -1.52 |
| INHBB    | 10.9  | 6.92  | STAT1    | -2.25 | -1.74 |
| INSIG2   | 2.39  | 2.29  | STBD1    | 1.86  | 1.92  |
| KCTD11   | 2.57  | 2.21  | STC1     | 9.86  | 4.56  |
| KIAA1191 | 1.55  | 1.74  | SYNPO    | 5.55  | 3.39  |
| LARS     | -2    | -1.63 | TALDO1   | -2.04 | -1.68 |
| LDHA     | 1.72  | 1.82  | TAP2     | -2.64 | -1.94 |
| LMAN1    | 1.53  | 1.68  | TBC1D9B  | 1.6   | 1.77  |
| LOX      | 2.08  | 2.34  | TOB2     | 1.32  | 1.50  |
| LSM10    | -1.85 | -1.53 | TPI1     | 2.45  | 2.39  |
| MAFF     | 1.76  | 1.97  | TRMT12   | -2.13 | -1.68 |
| MAPK7    | 1.64  | 1.83  | TXNRD1   | -2.53 | -1.88 |
| MARCKSL1 | 1.96  | 2.01  | VEGFA    | 3.95  | 2.95  |
| MEIS3    | 1.58  | 1.76  | VKORC1   | 1.59  | 1.73  |
| METTL26  | 1.46  | 1.64  | VWA1     | 3.85  | 2.55  |
| MIR210HG | 4.75  | 2.27  | WDR54    | 1.78  | 1.95  |
| MOSPD3   | 1.73  | 1.92  | WSB1     | 2.02  | 2.04  |
| MPI      | 1.7   | 1.78  | XYLT2    | 1.3   | 1.49  |
| MRPL24   | -1.87 | -1.54 | ZNF395   | 4.34  | 3.73  |
| MRPL52   | -1.9  | -1.56 | ZNF593   | -1.8  | -1.49 |

**S4 Table.** 154 differentially expressed genes as determined by both Partek GSA and DESeq2 with  $p < 0.05$ . Fold change by each algorithm is given.
