# Supplementary material for: Disruption of the HIF-1 pathway in individuals with Ollier disease and Maffucci syndrome
Source: PubMed Central journal article supplement (PMC9767349; doi:10.1371/journal.pgen.1010504), 2022-12-08
Supplement: pgen.1010504.s007.pdf [file pgen.1010504.s007.pdf]

### Full g:Profiler Results: Proband, Normoxia (4) vs. Control, Normoxia (3)

| Source                   | Term                                         | Adj. P | $-\log_{10}$<br>Adj. P | Sig. Genes in Term                                                                                                               |                                                                                                                                         |                                                                                                                                           |
|--------------------------|----------------------------------------------|--------|------------------------|----------------------------------------------------------------------------------------------------------------------------------|-----------------------------------------------------------------------------------------------------------------------------------------|-------------------------------------------------------------------------------------------------------------------------------------------|
| GO: Molecular Function   | peptide binding                              | 0.0158 | 1.7986                 | CLTB<br>CRIP1<br>HSPG2                                                                                                           | ITM2C<br>LRP1<br>OXTR                                                                                                                   | RPS6KB2                                                                                                                                   |
|                          | structural molecule activity                 | 0.0418 | 1.3786                 | AHNAK<br>CAV2<br>CLTB<br>COL12A1                                                                                                 | HSPB6<br>HSPG2<br>IGFBP7                                                                                                                | MRPL20<br>RPL26L1<br>TNC                                                                                                                  |
| GO: Biological Process   | tissue development                           | 0.0095 | 2.0214                 | ACTA2<br>ADAMTSL4<br>ANKRD1<br>CAV2<br>COL12A1<br>CRIP1<br>FLNB                                                                  | FZD1<br>GAA<br>HES4<br>ITGB1BP1<br>KLF2<br>LMO4<br>PHLDA2                                                                               | PKDCC<br>SEMA7A<br>SOX4<br>SRGN<br>TNC                                                                                                    |
| GO: Cellular Compartment | extracellular region                         | 0.0383 | 1.4163                 | ACTA2<br>ADAMTSL4<br>AHNAK<br>C1R<br>CFD<br>COL12A1<br>FGF5<br>FH<br>FLNB                                                        | GAA<br>HSPB6<br>HSPG2<br>IGFBP7<br>IL17RA<br>IL1R1<br>ITM2C<br>MARCKSL1<br>MYL12B                                                       | PKDCC<br>PRDX6<br>RHOBTB3<br>RPL26L1<br>SEMA7A<br>SRGN<br>TIMP3<br>TNC                                                                    |
|                          | collagen-containing extracellular matrix     | 0.0464 | 1.3326                 | ADAMTSL4<br>COL12A1<br>HSPG2                                                                                                     | IGFBP7<br>SEMA7A                                                                                                                        | TIMP3<br>TNC                                                                                                                              |
|                          | adherens junction                            | 0.0472 | 1.3253                 | AHNAK<br>CAV2<br>FLNB                                                                                                            | FZD1<br>HSPG2<br>LRP1                                                                                                                   | OXTR<br>TNC                                                                                                                               |
| KEGG Pathway             | Proteoglycans in cancer                      | 0.0146 | 1.8348                 | CAV2<br>FLNB                                                                                                                     | FZD1<br>HSPG2                                                                                                                           | RPS6KB2<br>TIMP3                                                                                                                          |
| Transcription Factor     | Factor: MAZ; motif: GGGGAGGG                 | 0.0074 | 2.1302                 | ADAMTSL4<br>AHNAK<br>BEX1<br>C1R<br>CAV2<br>CFD<br>COL12A1<br>CRIP1<br>EBNA1BP2<br>FAM43A<br>FGF5<br>FH<br>FLNB<br>FTSJ1<br>HES4 | HSPB6<br>HSPG2<br>IGFBP7<br>IL17RA<br>ITGB1BP1<br>ITM2C<br>KLC<br>LMO4<br>LRP1<br>MARCKSL1<br>MRPL20<br>OSMR<br>PHLDA2<br>PKDCC<br>PLK3 | PPP1R14A<br>PRDX6<br>PRRC2B<br>PRRC2C<br>RHOBTB3<br>RPS6KB2<br>RRP36<br>SELENOH<br>SELENOW<br>SEMA7A<br>SLC25A23<br>SOX4<br>TIMP3<br>WFS1 |
|                          | Factor: MAZ; motif: GGGGAGGG; match class: 0 | 0.0074 | 2.1302                 | ADAMTSL4<br>AHNAK<br>BEX1<br>C1R<br>CAV2<br>CFD<br>COL12A1<br>CRIP1<br>EBNA1BP2<br>FAM43A<br>FGF5<br>FH<br>FLNB                  | HSPB6<br>HSPG2<br>IGFBP7<br>IL17RA<br>ITGB1BP1<br>ITM2C<br>KLC1<br>LMO4<br>LRP1<br>MARCKSL1<br>MRPL20<br>OSMR<br>PHLDA2                 | PPP1R14A<br>PRDX6<br>PRRC2B<br>PRRC2C<br>RHOBTB3<br>RPS6KB2<br>RRP36<br>SELENOH<br>SELENOW<br>SEMA7A<br>SLC25A23<br>SOX4<br>TIMP3         |

|  |                                                       |        |         |          |          |
|--|-------------------------------------------------------|--------|---------|----------|----------|
|  |                                                       |        | FTSJ1   | PKDCC    | WFS1     |
|  |                                                       |        | HES4    | PLK3     |          |
|  |                                                       |        | AHNAK   | HSPG2    | PPP1R14A |
|  |                                                       |        | BEX1    | IL17RA   | PRDX6    |
|  |                                                       |        | C1R     | ITM2C    | PRRC2B   |
|  |                                                       |        | CAV2    | KLC1     | RHOBTB3  |
|  |                                                       |        | CFD     | LMO4     | RPS6KB2  |
|  |                                                       |        | COL12A1 | LRP1     | RRP36    |
|  | Factor: CKROX; motif:<br>SCCCTCCCC                    | 0.0335 | 1.4748  | MARCKSL1 | SELENOW  |
|  |                                                       |        |         | MRPL20   | SEMA7A   |
|  |                                                       |        |         | OSMR     | SLC25A23 |
|  |                                                       |        |         | PHLDA2   | SOX4     |
|  |                                                       |        |         | PKDCC    | TIMP3    |
|  |                                                       |        |         | PLK3     | WFS1     |
|  |                                                       |        | HSPB6   |          |          |
|  |                                                       |        | AHNAK   | HSPG2    | PRDX6    |
|  |                                                       |        | BEX1    | IL17RA   | PRRC2B   |
|  |                                                       |        | C1R     | ITM2C    | RHOBTB3  |
|  |                                                       |        | CAV2    | KLC1     | RPS6KB2  |
|  |                                                       |        | CFD     | LMO4     | RRP36    |
|  |                                                       |        | COL12A1 | LRP1     | SELENOW  |
|  | Factor: CKROX; motif:<br>SCCCTCCCC; match<br>class: 0 | 0.0335 | 1.4748  | MARCKSL1 | SEMA7A   |
|  |                                                       |        |         | MRPL20   | SLC25A23 |
|  |                                                       |        |         | OSMR     | SOX4     |
|  |                                                       |        |         | PHLDA2   | TIMP3    |
|  |                                                       |        |         | PKDCC    | WFS1     |
|  |                                                       |        |         | PLK3     |          |
|  |                                                       |        | HSPB6   | PPP1R14A |          |
|  |                                                       |        | AHNAK   | HSPG2    | PKDCC    |
|  |                                                       |        | BEX1    | IL17RA   | PRDX6    |
|  |                                                       |        | CFD     | KLF2     | PRRC2B   |
|  |                                                       |        | COL12A1 | LMO4     | RHOBTB3  |
|  |                                                       |        | FH      | LRP1     | SEMA7A   |
|  | Factor: Egr-1; motif:<br>GCGGGGCGG; match<br>class: 1 | 0.0382 | 1.4170  | MARCKSL1 | SLC25A23 |
|  |                                                       |        |         | MRPL20   | TIMP3    |
|  |                                                       |        |         | PHLDA2   | WFS1     |
|  |                                                       |        | HES4    |          |          |

**S5 Table .** g:Profiler results from the analysis of 58 genes differentially expressed in four proband fibroblast lines cultured at normoxia compared to three control fibroblast lines cultured at normoxia. Analysis was performed using the default settings and selecting the Ensembl ID with the most annotations for each gene name. The p-value cut-off was 0.05 after g:SCS significance adjustment.
