# Supplementary material for: Disruption of the HIF-1 pathway in individuals with Ollier disease and Maffucci syndrome
Source: PubMed Central journal article supplement (PMC9767349; doi:10.1371/journal.pgen.1010504), 2022-12-08
Supplement: pgen.1010504.s008.pdf [file pgen.1010504.s008.pdf]

### Full g:Profiler Results: Proband, Hypoxia (3) vs. Control, Hypoxia (3)

| Source                       | Term                                    | Adj. P | $-\log_{10}$ Adj. P | Sig. Genes in Term             |                                |                              |
|------------------------------|-----------------------------------------|--------|---------------------|--------------------------------|--------------------------------|------------------------------|
| GO:<br>Biological<br>Process | artery development                      | 0.0002 | 3.5691              | HES1<br>PKD2                   | PLXND1<br>SMAD7                | TBX2                         |
|                              | heart morphogenesis                     | 0.0013 | 2.8801              | GAA<br>HES1                    | PKD2<br>PLXND1                 | SMAD7<br>TBX2                |
|                              | aorta development                       | 0.0014 | 2.8315              | HES1<br>PKD2                   | PLXND1                         | TBX2                         |
|                              | gland development                       | 0.0018 | 2.7425              | HES1<br>LBH<br>PKD2            | PLXND1<br>TBX2<br>TGM2         | TNC                          |
|                              | tube morphogenesis                      | 0.0019 | 2.7047              | HES1<br>HOXA11<br>NR2F2        | PKD2<br>PLXND1<br>SMAD7        | TBX2<br>TGM2<br>TNC          |
|                              | tissue morphogenesis                    | 0.0021 | 2.6727              | HES1<br>HOXA11<br>PKD2         | PLXND1<br>SMAD7<br>TBX2        | TGM2<br>TNC                  |
|                              | epithelium development                  | 0.0033 | 2.4770              | HES1<br>HOXA11<br>LBH<br>NR2F2 | PKD2<br>PLXND1<br>SMAD7        | TBX2<br>TGM2<br>TNC          |
|                              | tissue development                      | 0.0039 | 2.4043              | GAA<br>GDF6<br>HES1<br>HOXA11  | LBH<br>NR2F2<br>PKD2<br>PLXND1 | SMAD7<br>TBX2<br>TGM2<br>TNC |
|                              | artery morphogenesis                    | 0.0043 | 2.3576              | HES1<br>PKD2                   | SMAD7                          | TBX2                         |
|                              | epithelial tube morphogenesis           | 0.0047 | 2.3266              | HES1<br>HOXA11                 | PKD2<br>PLXND1                 | TBX2<br>TNC                  |
|                              | morphogenesis of a branching epithelium | 0.0054 | 2.2672              | HOXA11<br>PKD2                 | PLXND1<br>TGM2                 | TNC                          |
|                              | animal organ morphogenesis              | 0.0058 | 2.2320              | GAA<br>HES1<br>HOXA11          | PKD2<br>PLXND1<br>SMAD7        | TBX2<br>TGM2<br>TNC          |
|                              | morphogenesis of an epithelium          | 0.0062 | 2.2031              | HES1<br>HOXA11<br>PKD2         | PLXND1<br>TBX2                 | TGM2<br>TNC                  |
|                              | morphogenesis of a branching structure  | 0.0077 | 2.1105              | HOXA11<br>PKD2                 | PLXND1<br>TGM2                 | TNC                          |
|                              | tube development                        | 0.0095 | 2.0222              | HES1<br>HOXA11<br>NR2F2        | PKD2<br>PLXND1<br>SMAD7        | TBX2<br>TGM2<br>TNC          |
|                              | ureteric bud development                | 0.0121 | 1.916211            | HES1<br>HOXA11                 | PKD2                           | SMAD7                        |
|                              | mesonephric epithelium development      | 0.0126 | 1.8986              | HES1<br>HOXA11                 | PKD2                           | SMAD7                        |
|                              | mesonephric tubule development          | 0.0126 | 1.8986              | HES1<br>HOXA11                 | PKD2                           | SMAD7                        |
|                              | mesonephros development                 | 0.0147 | 1.8303              | HES1<br>HOXA11                 | PKD2                           | SMAD7                        |
|                              | placenta blood vessel development       | 0.0172 | 1.7635              | HES1                           | NR2F2                          | PKD2                         |

|                              |                                                   |        |        |                                   |                                  |                      |
|------------------------------|---------------------------------------------------|--------|--------|-----------------------------------|----------------------------------|----------------------|
| GO:<br>Biological<br>Process | cardiac septum<br>development                     | 0.0206 | 1.6860 | HES1<br>PLXND1                    | SMAD7                            | TBX2                 |
|                              | gland<br>morphogenesis                            | 0.0288 | 1.5392 | PLXND1<br>TBX2                    | TGM2                             | TNC                  |
|                              | regulation of cell<br>population<br>proliferation | 0.0413 | 1.3835 | BEX4<br>FTH1<br>HES1<br>LBH       | MAB21L1<br>NR2F2<br>PKD2         | TBX2<br>TGM2<br>TNC  |
| Human Protein<br>Atlas       | placenta; decidual<br>cells [Approved,<br>Medium] | 0.0062 | 2.2039 | C1ORF198<br>FTH1<br>GLIPR1<br>LBH | LDLRAD2<br>PKD2<br>PLXND1<br>PVR | SMAD7<br>TBX2<br>TNC |
|                              | caudate; glial cells.<br>[Approved,<br>Medium]    | 0.0259 | 1.5864 | C1ORF198<br>FTH1<br>GLIPR1        | LBH<br>PLXND1<br>PVR             | SMAD7<br>TBX2        |

**S6 Table.** g:Profiler results from the analysis of 28 genes differentially expressed in three proband fibroblast lines cultured at hypoxia compared to three control fibroblast lines cultured at hypoxia. Analysis was performed using the default settings and selecting the Ensembl ID with the most annotations for each gene name. The p-value cut-off was 0.05 after g:SCS significance adjustment.
