# Supplementary material for: Disruption of the HIF-1 pathway in individuals with Ollier disease and Maffucci syndrome
Source: PubMed Central journal article supplement (PMC9767349; doi:10.1371/journal.pgen.1010504), 2022-12-08
Supplement: pgen.1010504.s009.pdf [file pgen.1010504.s009.pdf]

### Full g:Profiler Results: Proband, Hypoxia (3) vs. Proband, Normoxia (3)

| Source                         | Term                                           | Adj. P         | $-\log_{10}$<br>Adj. P | Sig. Genes in Term                                                                                  |                                                                                                        |                                                                                                        |
|--------------------------------|------------------------------------------------|----------------|------------------------|-----------------------------------------------------------------------------------------------------|--------------------------------------------------------------------------------------------------------|--------------------------------------------------------------------------------------------------------|
| GO:<br>Molecular<br>Function   | identical protein binding                      | 3.1073<br>E-06 | 5.5076                 | n = 66                                                                                              |                                                                                                        |                                                                                                        |
|                                | catalytic activity                             | 2.3171<br>E-05 | 4.6350                 | n = 155                                                                                             |                                                                                                        |                                                                                                        |
|                                | enzyme binding                                 | 3.9685<br>E-05 | 4.4013                 | n = 75                                                                                              |                                                                                                        |                                                                                                        |
|                                | protein binding                                | 4.7884<br>E-05 | 4.3198                 | n = 275                                                                                             |                                                                                                        |                                                                                                        |
|                                | monosaccharide binding                         | 6.2656<br>E-05 | 4.2030                 | ALDOA<br>EGLN1<br>G6PD<br>GPI                                                                       | GYS1<br>M6PR<br>OGFOD1<br>P4HA2                                                                        | PFKL<br>PFKP<br>TALDO1                                                                                 |
| GO:<br>Biological<br>Process   | glucose catabolic process                      | 1.60<br>E-08   | 7.7947                 | ALDOA<br>ENO1<br>ENO2<br>GAPDH                                                                      | GPI<br>PFKL<br>PFKP<br>PGAM1                                                                           | PGK1<br>TP53<br>TPI1                                                                                   |
|                                | canonical glycolysis                           | 1.73<br>E-08   | 7.7611                 | ALDOA<br>ENO1<br>ENO2<br>GAPDH                                                                      | GPI<br>PFKL<br>PFKP                                                                                    | PGAM1<br>PGK1<br>TPI1                                                                                  |
|                                | glucose catabolic process to pyruvate          | 1.73<br>E-08   | 7.7611                 | ALDOA<br>ENO1<br>ENO2<br>GAPDH                                                                      | GPI<br>PFKL<br>PFKP                                                                                    | PGAM1<br>PGK1<br>TPI1                                                                                  |
|                                | NADH regeneration                              | 1.73<br>E-08   | 7.7611                 | ALDOA<br>ENO1<br>ENO2<br>GAPDH                                                                      | GPI<br>PFKL<br>PFKP                                                                                    | PGAM1<br>PGK1<br>TPI1                                                                                  |
|                                | generation of precursor metabolites and energy | 2.52<br>E-08   | 7.5989                 | ACADVL<br>AKR7A2<br>ALDOA<br>BNIP3<br>CS<br>DDIT4<br>ENO1<br>ENO2<br>G6PD<br>GAPDH<br>GNPDA1<br>GPI | GYS1<br>IDH1<br>LDHA<br>LOXL2<br>MYBBP1A<br>NDUFB4<br>NDUFB8<br>NQO1<br>P4HA2<br>PFKL<br>PFKP<br>PGAM1 | PGAM4<br>PGD<br>PGK1<br>PPP1R3D<br>PPP1R3G<br>PYGB<br>STBD1<br>TALDO1<br>TKT<br>TP53<br>TPI1<br>TXNRD1 |
| GO:<br>Cellular<br>Compartment | cytoplasmic part                               | 3.06<br>E-14   | 13.5141                | n = 248                                                                                             |                                                                                                        |                                                                                                        |
|                                | cytoplasm                                      | 1.03<br>E-13   | 12.9886                | n = 276                                                                                             |                                                                                                        |                                                                                                        |
|                                | cytosol                                        | 2.29<br>E-10   | 9.6401                 | n = 152                                                                                             |                                                                                                        |                                                                                                        |
|                                | intracellular                                  | 1.17<br>E-08   | 7.9327                 | n = 307                                                                                             |                                                                                                        |                                                                                                        |
|                                | intracellular part                             | 1.81<br>E-08   | 7.7418                 | n = 306                                                                                             |                                                                                                        |                                                                                                        |
| KEGG Pathways                  | Biosynthesis of amino acids                    | 1.8<br>2E-10   | 9.7405                 | ALDOA<br>CS<br>ENO1<br>ENO2<br>GAPDH<br>GOT2                                                        | IDH1<br>PFKL<br>PFKP<br>PGAM1<br>PGAM4                                                                 | PGK1<br>PYCR3<br>TALDO1<br>TKT<br>TPI1                                                                 |

|                      |                                                                |                |         |                                                                   |                                                               |                                                        |
|----------------------|----------------------------------------------------------------|----------------|---------|-------------------------------------------------------------------|---------------------------------------------------------------|--------------------------------------------------------|
| KEGG Pathways        | Carbon metabolism                                              | 2.12<br>E-09   | 8.6736  | ALDOA<br>CS<br>ENO1<br>ENO2<br>G6PD<br>GAPDH                      | GOT2<br>GPI<br>IDH1<br>PFKL<br>PFKP<br>PGAM1                  | PGAM4<br>PGD<br>PGK1<br>TALDO1<br>TKT<br>TPI1          |
|                      | Glycolysis /<br>Gluconeogenesis                                | 1.02<br>E-07   | 6.9931  | ALDH3A2<br>ALDOA<br>ENO1<br>ENO2<br>GAPDH                         | GPI<br>LDHA<br>PFKL<br>PFKP                                   | PGAM1<br>PGAM4<br>PGK1<br>TPI1                         |
|                      | HIF-1 signaling<br>pathway                                     | 1.5769<br>E-06 | 5.8022  | ALDOA<br>EGLN1<br>ENO1<br>ENO2<br>GAPDH                           | LDHA<br>LTBR<br>PFKL<br>PGK1<br>SERPINE1                      | SLC2A1<br>TFRC<br>TIMP1<br>VEGFA                       |
|                      | Pentose phosphate<br>pathway                                   | 1.1786<br>E-05 | 4.9286  | ALDOA<br>G6PD<br>GPI                                              | PFKL<br>PFKP<br>PGD                                           | TALDO1<br>TKT                                          |
| REACTOME<br>Pathways | Metabolism of<br>carbohydrates                                 | 2.3926<br>E-06 | 5.6211  | ALDOA<br>CHP1<br>CHST3<br>ENO1<br>ENO2<br>G6PD<br>GAPDH<br>GNPDA1 | GOT2<br>GPI<br>GYS1<br>HAS2<br>HYAL2<br>PFKL<br>PFKP<br>PGAM1 | PGD<br>PGK1<br>PYGB<br>SLC2A1<br>TALDO1<br>TKT<br>TPI1 |
|                      | Gluconeogenesis                                                | 4.203<br>E-06  | 5.3764  | ALDOA<br>ENO1<br>ENO2                                             | GAPDH<br>GOT2<br>GPI                                          | PGAM1<br>PGK1<br>TPI1                                  |
|                      | Glycolysis                                                     | 4.1106<br>E-05 | 4.3860  | ALDOA<br>ENO1<br>ENO2<br>GAPDH                                    | GNPDA1<br>GPI<br>PFKL<br>PFKP                                 | PGAM1<br>PGK1<br>TPI1                                  |
|                      | Glucose metabolism                                             | 6.0413<br>E-05 | 4.2188  | ALDOA<br>ENO1<br>ENO2<br>GAPDH                                    | GNPDA1<br>GOT2<br>GPI<br>PFKL                                 | PFKP<br>PGAM1<br>PGK1<br>TPI1                          |
|                      | Metabolism                                                     | 0.0078         | 2.1062  | n = 68                                                            |                                                               |                                                        |
| Wiki Pathways        | Metabolic<br>reprogramming in<br>colon cancer                  | 3.58<br>E-12   | 11.4455 | ENO1<br>FASN<br>G6PD<br>GAPDH<br>GOT2                             | GPI<br>LDHA<br>PFKL<br>PGAM1<br>PGD                           | PGK1<br>SLC16A3<br>SLC2A1<br>TALDO1<br>TKT             |
|                      | Cori Cycle                                                     | 6.54<br>E-11   | 10.1845 | G6PD<br>GAPDH<br>GPI<br>LDHA                                      | PFKP<br>PGAM1<br>PGK1                                         | SLC2A1<br>TALDO1<br>TPI1                               |
|                      | Glycolysis and<br>Gluconeogenesis                              | 4.42<br>E-09   | 8.3546  | ALDOA<br>ENO1<br>ENO2<br>GAPDH<br>GOT2                            | GPI<br>LDHA<br>PFKL<br>PFKP                                   | PGAM1<br>PGK1<br>SLC2A1<br>TPI1                        |
|                      | Photodynamic<br>therapy-induced<br>HIF-1 survival<br>signaling | 1.7999<br>E-06 | 5.7447  | BNIP3<br>BNIP3L<br>EGLN1<br>LDHA                                  | PFKL<br>PGK1<br>SERPINE1                                      | SLC2A1<br>TP53<br>VEGFA                                |
|                      | Pathways in clear<br>cell renal cell<br>carcinoma              | 2.2839<br>E-06 | 5.6413  | ALDOA<br>ENO1<br>ENO2<br>FASN<br>GAPDH                            | GPI<br>LDHA<br>PFKL<br>PFKP<br>PGK1                           | SLC2A1<br>SQSTM1<br>TPI1<br>VEGFA                      |

|                      |                                                                     |                |         |                                                                                                                                                                                                                                                                                                                                                                                                           |
|----------------------|---------------------------------------------------------------------|----------------|---------|-----------------------------------------------------------------------------------------------------------------------------------------------------------------------------------------------------------------------------------------------------------------------------------------------------------------------------------------------------------------------------------------------------------|
| Transcription Factor | Factor: ZF5; motif: GSGCGCGR; match class: 1                        | 2.87<br>E-19   | 18.5428 | n = 326                                                                                                                                                                                                                                                                                                                                                                                                   |
|                      | Factor: E2F-3:HES-7; motif: NNNSGCGCSNNNN NCRCGYGNN; match class: 1 | 2.24<br>E-17   | 16.6492 | n = 334                                                                                                                                                                                                                                                                                                                                                                                                   |
|                      | Factor: MAZ; motif: GGGMGGGSSGGG GGGGGGGGG; match class: 1          | 2.09<br>E-15   | 14.6808 | n = 320                                                                                                                                                                                                                                                                                                                                                                                                   |
|                      | Factor: E2F-1:HES-7; motif: GGCRGTGSYNNW NGGCGCSM; match class: 1   | 2.24<br>E-14   | 13.6506 | n = 333                                                                                                                                                                                                                                                                                                                                                                                                   |
|                      | Factor: ZF5; motif: NRNGNGCGCGCWN ; match class: 0                  | 3.02<br>E-14   | 13.5201 | n = 330                                                                                                                                                                                                                                                                                                                                                                                                   |
| miRNA sites          | hsa-miR-331-3p                                                      | 2.671<br>E-06  | 5.5733  | ACTG1<br>ANKRD52<br>APBB1<br>BTG1<br>CAD<br>DDX21<br>FASN<br>FCHSD1<br>FUT11<br>GAPDH<br>GNB2<br>GPI<br>HSPA8<br>HSPD1<br>KAT2A<br>KDM6B<br>LDHA<br>MRPS26<br>MYBBP1A<br>NCDN<br>NOP2<br>PFKL<br>PGAM1<br>POLR3H<br>PSMD11<br>PSME3<br>TKT<br>TPI1<br>UBQLN1<br>VARS                                                                                                                                      |
|                      | hsa-miR-423-5p                                                      | 5.1039<br>E-06 | 5.2920  | ACTG1<br>ANKRD52<br>APEX1<br>CBX6<br>CLCN7<br>DDX21<br>ERRF1<br>FAM98A<br>FHOD1<br>GAPDH<br>POLR3H<br>KDM6B<br>MRPL34<br>MSANTD3<br>NDRG1<br>NOLC1<br>PGAM1<br>PGAM4<br>PNRC1<br>PSMD11<br>RTL8C<br>SAR1B<br>SLC48A1<br>SQSTM1<br>TIMP3<br>TXNIP<br>WDR45B                                                                                                                                                |
|                      | hsa-miR-484                                                         | 6.2184<br>E-05 | 4.2063  | ADAR<br>APEX1<br>ATP1A1<br>BTG1<br>C12ORF49<br>C1QBP<br>CBX6<br>CCDC97<br>CLUH<br>DDX41<br>DVL2<br>ENO1<br>FASN<br>FUT11<br>GAPDH<br>GCN1<br>GLTP<br>GNB2<br>GOT2<br>GPATCH4<br>HSP90AB1<br>ITGA5<br>M6PR<br>MDM2<br>NOLC1<br>PARP1<br>PFKL<br>PGAM1<br>PGD<br>POLR3H<br>PSME3<br>PSMG1<br>PYGB<br>RFX5<br>RRS1<br>SLC2A1<br>SQSTM1<br>SRPRA<br>SRSF9<br>STIP1<br>TKT<br>UBQLN1<br>USP5<br>VARS<br>VKORC1 |
|                      | hsa-let-7b-5p                                                       | 0.0004         | 3.3827  | N = 53                                                                                                                                                                                                                                                                                                                                                                                                    |
|                      | hsa-miR-615-3p                                                      | 0.01580        | 1.8011  | ACADVL<br>ALDOA<br>BCKDK<br>CBX6<br>HSPA8<br>IPO13<br>KAT2A<br>KIAA1191<br>PGAM4<br>PLEKHB2<br>POLR3H<br>SEMA7A                                                                                                                                                                                                                                                                                           |

|          |        |          |
|----------|--------|----------|
| DDIT4    | NCL    | SLC30A1  |
| DDX19A   | NOLC1  | SLC38A7  |
| ENO1     | NOP2   | TMEM126B |
| FAM98A   | NUDT16 | TMSB10   |
| FASN     | OGFOD1 | TPI1     |
| GAPDH    | PARP1  | VARS     |
| HACD3    | PCNX3  | VDAC1    |
| HSP90AB1 | PFKP   | VIM      |
| HSPA4    | PGAM1  | VPS18    |

**S7 Table.** Top five g:Profiler results for each category from the analysis of 363 genes differentially expressed in three proband fibroblast lines cultured at hypoxia compared to the same three proband fibroblast lines cultured at normoxia. Analysis was performed using the default settings and selecting the Ensembl ID with the most annotations for each gene name. The p-value cut-off was 0.05 after g:SCS significance adjustment. If number of significant genes in g:Profiler term is greater than 50, *n* is shown; full lists are available upon request.
