# Supplementary material for: Disruption of the HIF-1 pathway in individuals with Ollier disease and Maffucci syndrome
Source: PubMed Central journal article supplement (PMC9767349; doi:10.1371/journal.pgen.1010504), 2022-12-08
Supplement: pgen.1010504.s010.pdf [file pgen.1010504.s010.pdf]

### Full g:Profiler Results: Control, Hypoxia (3) vs. Control, Normoxia (3)

| Source                         | Term                                                                        | Adj. P       | $-\log_{10}$ Adj. P | Sig. Genes in Term                                                |                                                                   |                                                                             |
|--------------------------------|-----------------------------------------------------------------------------|--------------|---------------------|-------------------------------------------------------------------|-------------------------------------------------------------------|-----------------------------------------------------------------------------|
| GO:<br>Molecular<br>Function   | monosaccharide binding                                                      | 2.74<br>E-07 | 6.5624              | ALDOA<br>EGLN1<br>GPI<br>GYS1                                     | LMAN1<br>P4HA2<br>PFKL                                            | PFKP<br>PLOD2<br>TALDO1                                                     |
|                                | intramolecular oxidoreductase activity, interconverting aldoses and ketoses | 0.0003       | 3.5110              | GNPDA1<br>GPI                                                     | MPI                                                               | TPI1                                                                        |
|                                | carbohydrate binding                                                        | 0.0012       | 2.8872              | ALDOA<br>EGLN1<br>GPI<br>GYS1                                     | LMAN1<br>P4HA2<br>PFKL<br>PFKP                                    | PLOD2<br>PPP1R3G<br>STBD1<br>TALDO1                                         |
|                                | oxidoreductase activity                                                     | 0.0013       | 2.8668              | ADH5<br>ALKBH5<br>APEX1<br>EGLN1<br>ERO1A<br>FTH1<br>GAPDH        | HSD17B10<br>KIAA1191<br>LDHA<br>LOX<br>NQO1<br>P4HA2<br>P4HB      | PGK1<br>PLOD2<br>RSAD1<br>SRXN1<br>TXNRD1<br>VKORC1                         |
|                                | intramolecular oxidoreductase activity                                      | 0.0015       | 2.8113              | ERO1A<br>GNPDA1                                                   | GPI<br>MPI                                                        | P4HB<br>TPI1                                                                |
| GO:<br>Biological<br>Process   | glucose catabolic process to pyruvate                                       | 4.17<br>E-14 | 13.3793             | ALDOA<br>ALDOC<br>ENO1<br>ENO2                                    | GAPDH<br>GPI<br>PFKL<br>PFKP                                      | PGAM1<br>PGK1<br>TPI1                                                       |
|                                | canonical glycolysis                                                        | 4.17<br>E-14 | 13.3793             | ALDOA<br>ALDOC<br>ENO1<br>ENO2                                    | GAPDH<br>GPI<br>PFKL<br>PFKP                                      | PGAM1<br>PGK1<br>TPI1                                                       |
|                                | NADH regeneration                                                           | 4.17<br>E-14 | 13.3793             | ALDOA<br>ALDOC<br>ENO1<br>ENO2                                    | GAPDH<br>GPI<br>PFKL<br>PFKP                                      | PGAM1<br>PGK1<br>TPI1                                                       |
|                                | glycolytic process through fructose-6-phosphate                             | 7.19<br>E-14 | 13.1434             | ALDOA<br>ALDOC<br>ENO1<br>ENO2                                    | GAPDH<br>GPI<br>PFKL<br>PFKP                                      | PGAM1<br>PGK1<br>TPI1                                                       |
|                                | glycolytic process through glucose-6-phosphate                              | 7.19<br>E-14 | 13.1434             | ALDOA<br>ALDOC<br>ENO1<br>ENO2                                    | GAPDH<br>GPI<br>PFKL<br>PFKP                                      | PGAM1<br>PGK1<br>TPI1                                                       |
| GO:<br>Cellular<br>Compartment | cytoplasmic part                                                            | 4.64<br>E-06 | 5.3334              | N=107                                                             |                                                                   |                                                                             |
|                                | cytoplasm                                                                   | 6.67<br>E-06 | 5.17577             | N=119                                                             |                                                                   |                                                                             |
|                                | cytosol                                                                     | 1.85<br>E-05 | 4.7333              | N=69                                                              |                                                                   |                                                                             |
|                                | extracellular exosome                                                       | 0.0001       | 3.8590              | ADH5                                                              | LDHA                                                              | PGM1                                                                        |
|                                |                                                                             |              |                     | ALDOA<br>ALDOC<br>CCT6A<br>CNDP2<br>ENO1<br>ENO2<br>FTH1<br>GAPDH | LMAN1<br>MARCKSL1<br>MPI<br>MUC1<br>NDRG1<br>NEU1<br>P4HB<br>PFKL | PLOD2<br>PTPRF<br>RAB29<br>SERPINE1<br>SLC2A1<br>SLC3A2<br>SQSTM1<br>TALDO1 |

|                                 |              |         |  |         |          |          |
|---------------------------------|--------------|---------|--|---------|----------|----------|
|                                 |              |         |  | GNPDA1  | PFKP     | TPI1     |
|                                 |              |         |  | GPI     | PGAM1    | TXNRD1   |
|                                 |              |         |  | HSPD1   | PGAM4    | VWA1     |
|                                 |              |         |  | HSPH1   | PGK1     |          |
|                                 |              |         |  | ADH5    | LDHA     |          |
|                                 |              |         |  | ALDOA   | LMAN1    | PGM1     |
|                                 |              |         |  | ALDOC   | MARCKSL1 | PLOD2    |
|                                 |              |         |  | CCT6A   | MPI      | PTPRF    |
|                                 |              |         |  | CNDP2   | MUC1     | RAB29    |
|                                 |              |         |  | ENO1    | NDRG1    | SERPINE1 |
| extracellular vesicle           | 0.0001       | 3.7423  |  | ENO2    | NEU1     | SLC2A1   |
|                                 |              |         |  | FTH1    | P4HB     | SLC3A2   |
|                                 |              |         |  | GAPDH   | PFKL     | SQSTM1   |
|                                 |              |         |  | GNPDA1  | PFKP     | TALDO1   |
|                                 |              |         |  | GPI     | PGAM1    | TPI1     |
|                                 |              |         |  | HSPD1   | PGAM4    | TXNRD1   |
|                                 |              |         |  | HSPH1   | PGK1     | VWA1     |
|                                 |              |         |  | ADH5    | GAPDH    | PGAM1    |
|                                 |              |         |  | ALDOA   | GPI      | PGAM4    |
| Glycolysis /<br>Gluconeogenesis | 6.99<br>E-15 | 14.1556 |  | ALDOC   | LDHA     | PGK1     |
|                                 |              |         |  | ENO1    | PFKL     | PGM1     |
|                                 |              |         |  | ENO2    | PFKP     | TPI1     |
|                                 |              |         |  | ADH5    | GAPDH    | PGAM4    |
|                                 |              |         |  | ALDOA   | GPI      | PGK1     |
| Carbon metabolism               | 5.20<br>E-10 | 9.2842  |  | ALDOC   | PFKL     | TALDO1   |
|                                 |              |         |  | ENO1    | PFKP     | TPI1     |
|                                 |              |         |  | ENO2    | PGAM1    |          |
|                                 |              |         |  | ALDOA   | GAPDH    | PGAM4    |
|                                 |              |         |  | ALDOC   | PFKL     | PGK1     |
| Biosynthesis of<br>amino acids  | 6.23<br>E-10 | 9.2058  |  | ENO1    | PFKP     | TALDO1   |
|                                 |              |         |  | ENO2    | PGAM1    | TPI1     |
|                                 |              |         |  | ALDOA   | GAPDH    |          |
|                                 |              |         |  | EGLN1   | LDHA     | SERPINE1 |
| HIF-1 signaling<br>pathway      | 3.13<br>E-07 | 6.5042  |  | ENO1    | PFKL     | SLC2A1   |
|                                 |              |         |  | ENO2    | PGK1     | VEGFA    |
|                                 |              |         |  | ALDOA   |          |          |
|                                 |              |         |  | ALDOC   | PFKL     | PGM1     |
| Pentose phosphate<br>pathway    | 1.15<br>E-06 | 5.9405  |  | GPI     | PFKP     | TALDO1   |
|                                 |              |         |  | ALDOA   | GAPDH    | PFKP     |
|                                 |              |         |  | ALDOC   | GNPDA1   | PGAM1    |
| Glycolysis                      | 4.51<br>E-10 | 9.3455  |  | ENO1    | GPI      | PGK1     |
|                                 |              |         |  | ENO2    | PFKL     | TPI1     |
|                                 |              |         |  | ALDOA   | GPI      | PGK1     |
|                                 |              |         |  | ALDOC   | GYS1     | PGM1     |
|                                 |              |         |  | CHST2   | HAS2     | SLC2A1   |
| Metabolism of<br>carbohydrates  | 2.39<br>E-09 | 8.6215  |  | ENO1    | PFKL     | TALDO1   |
|                                 |              |         |  | ENO2    | PFKP     | TPI1     |
|                                 |              |         |  | GAPDH   | PGAM1    | XYLT2    |
|                                 |              |         |  | GNPDA1  |          |          |
|                                 |              |         |  | ALDOA   | ENO2     | PGAM1    |
|                                 |              |         |  | ALDOC   | GAPDH    | PGK1     |
| Gluconeogenesis                 | 4.18<br>E-09 | 8.3785  |  | ENO1    | GPI      | TPI1     |
|                                 |              |         |  | ALDOA   | GAPDH    | PFKP     |
|                                 |              |         |  | ALDOC   | GNPDA1   | PGAM1    |
| Glucose metabolism              | 8.59<br>E-09 | 8.0658  |  | ENO1    | GPI      | PGK1     |
|                                 |              |         |  | ENO2    | PFKL     | TPI1     |
|                                 |              |         |  | ADH5    | GNPDA1   | PFKP     |
|                                 |              |         |  | AIMP2   | GPI      | PGAM1    |
|                                 |              |         |  | ALDOA   | GYS1     | PGK1     |
|                                 |              |         |  | ALDOC   | HAS2     | PGM1     |
| Metabolism                      | 3.28<br>E-05 | 4.48433 |  | ANGPTL4 | HILPDA   | PSMC2    |
|                                 |              |         |  | BCKDK   | HSD17B10 | SEPHS2   |
|                                 |              |         |  | CA12    | INSIG2   | SLC16A3  |
|                                 |              |         |  | CACNB3  | LARS     | SLC2A1   |
|                                 |              |         |  | CHST2   | LDHA     | SLC3A2   |

|                                                  |                                                       |              |         |                                                                                                                                        |                                                                                                                                   |                                                                                                                                 |
|--------------------------------------------------|-------------------------------------------------------|--------------|---------|----------------------------------------------------------------------------------------------------------------------------------------|-----------------------------------------------------------------------------------------------------------------------------------|---------------------------------------------------------------------------------------------------------------------------------|
|                                                  |                                                       |              |         | CNDP2                                                                                                                                  | NEU1                                                                                                                              | TALDO1                                                                                                                          |
|                                                  |                                                       |              |         | COX14                                                                                                                                  | NQO1                                                                                                                              | TPI1                                                                                                                            |
|                                                  |                                                       |              |         | ENO1                                                                                                                                   | ODC1                                                                                                                              | TXNRD1                                                                                                                          |
|                                                  |                                                       |              |         | ENO2                                                                                                                                   | PCYT2                                                                                                                             | VKORC1                                                                                                                          |
|                                                  |                                                       |              |         | GAPDH                                                                                                                                  | PFKL                                                                                                                              | XYLT2                                                                                                                           |
|                                                  |                                                       |              |         | GLTP                                                                                                                                   |                                                                                                                                   |                                                                                                                                 |
| Wiki Pathways                                    | Pathways in clear cell renal cell carcinoma           | 1.01<br>E-13 | 12.9958 | ALDOA<br>ALDOC<br>ENO1<br>ENO2<br>GAPDH<br>GPI                                                                                         | LDHA<br>PFKL<br>PFKP<br>PGK1<br>PGM1                                                                                              | PLOD2<br>SLC2A1<br>SQSTM1<br>TPI1<br>VEGFA                                                                                      |
|                                                  | Glycolysis and Gluconeogenesis                        | 1.48<br>E-13 | 12.8290 | ALDOA<br>ALDOC<br>ENO1<br>ENO2<br>GAPDH                                                                                                | GPI<br>LDHA<br>PFKL<br>PFKP                                                                                                       | PGAM1<br>PGK1<br>SLC2A1<br>TPI1                                                                                                 |
|                                                  | Cori Cycle                                            | 2.81<br>E-12 | 11.5512 | GAPDH<br>GPI<br>LDHA                                                                                                                   | PFKP<br>PGAM1<br>PGK1                                                                                                             | SLC2A1<br>TALDO1<br>TPI1                                                                                                        |
|                                                  | Metabolic reprogramming in colon cancer               | 2.96<br>E-09 | 8.5287  | ENO1<br>GAPDH<br>GPI<br>LDHA                                                                                                           | PFKL<br>PGAM1<br>PGK1                                                                                                             | SLC16A3<br>SLC2A1<br>TALDO1                                                                                                     |
|                                                  | Photodynamic therapy-induced HIF-1 survival signaling | 2.51<br>E-08 | 7.6000  | BNIP3<br>BNIP3L<br>EGLN1                                                                                                               | LDHA<br>PFKL<br>PGK1                                                                                                              | SERPINE1<br>SLC2A1<br>VEGFA                                                                                                     |
|                                                  | Factor: Churchill; motif: CGGGNN                      | 3.51<br>E-05 | 4.4548  | N=135                                                                                                                                  |                                                                                                                                   |                                                                                                                                 |
| Factor: Churchill; motif: CGGGNN; match class: 0 | 3.51<br>E-05                                          | 4.4548       | N=135   |                                                                                                                                        |                                                                                                                                   |                                                                                                                                 |
| Transcription Factor                             | Factor: HIF1A; motif: NNACGTGCNN; match class: 0      | 3.81<br>E-05 | 4.4195  | ALDOA<br>BCKDK<br>BNIP3<br>BNIP3L<br>C11ORF98<br>C4ORF3<br>CA12<br>CACNB3<br>CCT6A<br>DDX21<br>DDX41<br>ENO1<br>ENO2<br>ERO1A<br>FUT11 | GAPDH<br>HAS2<br>HILPDA<br>KCTD11<br>LDHA<br>MAPK7<br>METTL26<br>MOSPD3<br>NAB2<br>NOP56<br>NPM3<br>OSMR<br>P4HA2<br>PFKL<br>PFKP | PLXNA3<br>PPP1R3G<br>PRMT6<br>PTPRF<br>RSAD1<br>SEPHS2<br>SLC16A3<br>SMIM3<br>STAT1<br>STC1<br>TPI1<br>VEGFA<br>VKORC1<br>WDR54 |
|                                                  | Factor: HIF1A; motif: NNACGTGCNN                      | 3.81<br>E-05 | 4.4195  | ALDOA<br>BCKDK<br>BNIP3<br>BNIP3L<br>C11ORF98<br>C4ORF3<br>CA12<br>CACNB3<br>CCT6A<br>DDX21<br>DDX41<br>ENO1<br>ENO2<br>ERO1A<br>FUT11 | GAPDH<br>HAS2<br>HILPDA<br>KCTD11<br>LDHA<br>MAPK7<br>METTL26<br>MOSPD3<br>NAB2<br>NOP56<br>NPM3<br>OSMR<br>P4HA2<br>PFKL<br>PFKP | PLXNA3<br>PPP1R3G<br>PRMT6<br>PTPRF<br>RSAD1<br>SEPHS2<br>SLC16A3<br>SMIM3<br>STAT1<br>STC1<br>TPI1<br>VEGFA<br>VKORC1<br>WDR54 |

|                     |                                                            |              |        |                                           |                                          |                               |
|---------------------|------------------------------------------------------------|--------------|--------|-------------------------------------------|------------------------------------------|-------------------------------|
|                     | Factor: HIF1; motif:<br>GNNKACGTGCGGNN;<br>match class: 0  | 4.17<br>E-05 | 4.3796 | n = 56                                    |                                          |                               |
| miRNA Sites         | hsa-miR-331-3p                                             | 0.0182       | 1.7394 | APBB1<br>APOL6<br>DDX21<br>FUT11<br>GAPDH | GPI<br>HSPD1<br>LARS<br>LDHA<br>MARCKSL1 | NOP2<br>PFKL<br>PGAM1<br>TPI1 |
| Human Protein Atlas | urinary bladder;<br>urothelial cells<br>[Approved,<br>Low] | 0.0313       | 1.5042 | n = 62                                    |                                          |                               |

**S8 Table.** Top five g:Profiler results for each category from the analysis of 154 genes differentially expressed in three control fibroblast lines cultured at hypoxia compared to the same three control fibroblast lines cultured at normoxia. Analysis was performed using the default settings and selecting the Ensembl ID with the most annotations for each gene name. The p-value cut-off was 0.05 after g:SCS significance adjustment. If number of significant genes in g:Profiler term is greater than 50, *n* is shown; full lists are available upon request.
