# Supplementary material for: Disruption of the HIF-1 pathway in individuals with Ollier disease and Maffucci syndrome
Source: PubMed Central journal article supplement (PMC9767349; doi:10.1371/journal.pgen.1010504), 2022-12-08
Supplement: pgen.1010504.s011.pdf [file pgen.1010504.s011.pdf]

| Proband ID | Gene mutated  | Variant     | Forward Primer        | Reverse Primer        |
|------------|---------------|-------------|-----------------------|-----------------------|
| 1          | <i>HIF1A</i>  | p.Val74Leu  | ggaaacacctgcttccgaca  | gggaggggaaaagccagtat  |
| 2          | <i>HIF1A</i>  | p.Pro239Leu | ctgggcaggaagtaggtcat  | ggctgtgtcgactgaggaaa  |
| 3          | <i>HIF1A</i>  | p.Asp446Tyr | gtgaaaatccttgtggccgg  | tccatcggaaggactaggtgt |
| 4          | <i>HIF1A</i>  | p.Arg655His | aaagcgaagtcctcaaagc   | acacgttagggcttcttggga |
| 5          | <i>HIF1A</i>  | p.Ala678Val | ccactgccaccactgatgaa  | tgagatggtgccatgccatt  |
| 6          | <i>HIF1A</i>  | p.Ser716Cys | actagtgccacatcatcacca | tgagatggtgccatgccatt  |
| 6          | <i>IDH1</i>   | p.Arg132His | atgtgttgagatggacgcct  | atattctgggtggcacggtc  |
| 7          | <i>HIF1A</i>  | p.Glu481Lys | ccccacagacacagaaactga | atcctgaatctggggcatgg  |
| 7          | <i>VHL</i>    | p.Pro25Leu  | gttccatcctctaccgagcg  | gcagaagatgacctggggagg |
| 8          | <i>VHL</i>    | p.Pro25Leu  | gttccatcctctaccgagcg  | gcagaagatgacctggggagg |
| 9          | <i>VHL</i>    | p.Glu52Lys  | cgaagactacggaggtcgac  | tcaagttgagccatacggg   |
| 10         | <i>VHL</i>    | p.Pro81Ser  | gtacggcctgaagaagacg   | gcttcagaccgtgctatcgt  |
| 11         | <i>VHL</i>    | p.Ile180Val | caagcccagcccatttcaag  | tcccatccgttgatgtgcaa  |
| 12         | <i>VHL</i>    | p.Arg210Trp | gactggacatcgtcaggtcg  | aatgccaccaccttctcctg  |
| 13         | <i>IDH1</i>   | p.Arg132His | atgtgttgagatggacgcct  | atattctgggtggcacggtc  |
| 14         | <i>IDH1</i>   | p.Ile189Val | taactgggactagaggcgcc  | gttggaaacctgtctgggact |
| 16         | <i>IDH2</i>   | p.Thr435Met | tggtgaggtaaaacgcact   | atggctgttctgatgcccaa  |
| 17         | <i>IDH2</i>   | p.Asp225Asn | agatggggtctcactgttgc  | gccggcactttcaaaatggt  |
| 18         | <i>KDM4C</i>  | p.Tyr4Cys   | cctcactccacagatggctg  | ctgagcctgggatgttgagg  |
| 19         | <i>KDM4C</i>  | p.Arg371Gln | tccaaccggttgtgtttca   | tgccatgtcgagcaacttca  |
| 19         | <i>CDKN2A</i> | p.Ala121Thr | atggttactgcctctgggtgc | gtgagggggctctacacaag  |

**S9 Table.** Primer pairs designed for genomic DNA amplification and Sanger sequencing of candidate variants.
